# Supplementary material for: Chemical Composition and Valorization of Broccoli Leaf By-Products (Brassica oleracea L. Variety: Italica) to Ameliorate Reno-Hepatic Toxicity Induced by Gentamicin in Rats
Source: MDPI journal article supplement (doi:10.3390/app12146903), 2022-07-07
Supplement: s1 [file s1]

**Supplementary-S: 1D- and 2D- NMR**  
**spectroscopic data of pure isolated compound**

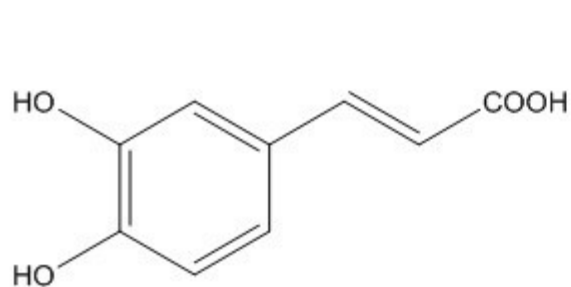

(1)

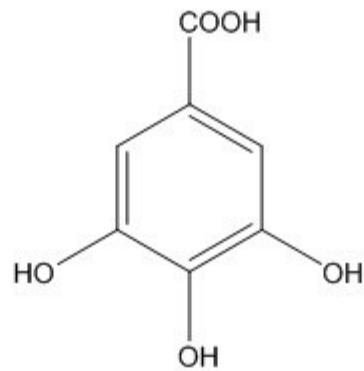

(2)

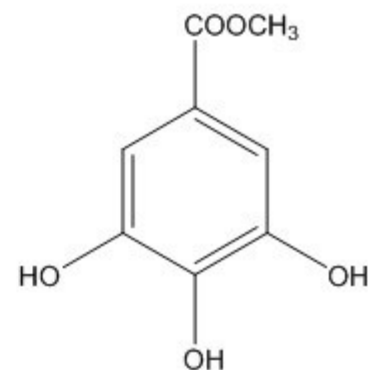

(3)

Structures of pure isolated constituents from TME of *Brassica oleracea*.  
Caffeic acid (1), Gallic acid (2) and Methyl gallate (3).

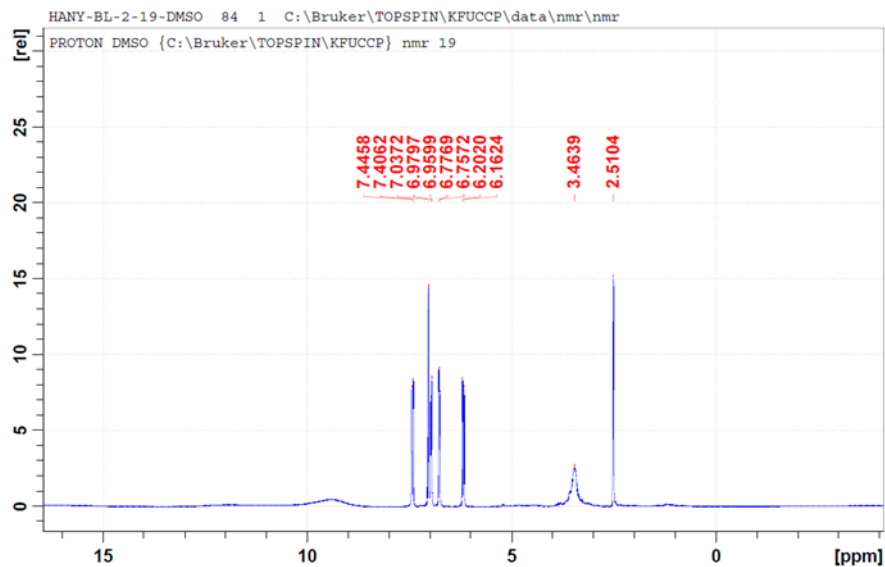

**$^1\text{H}$ -NMR full spectrum of Caffeic Acid (400 MHz, DMSO- $d_6$ )**

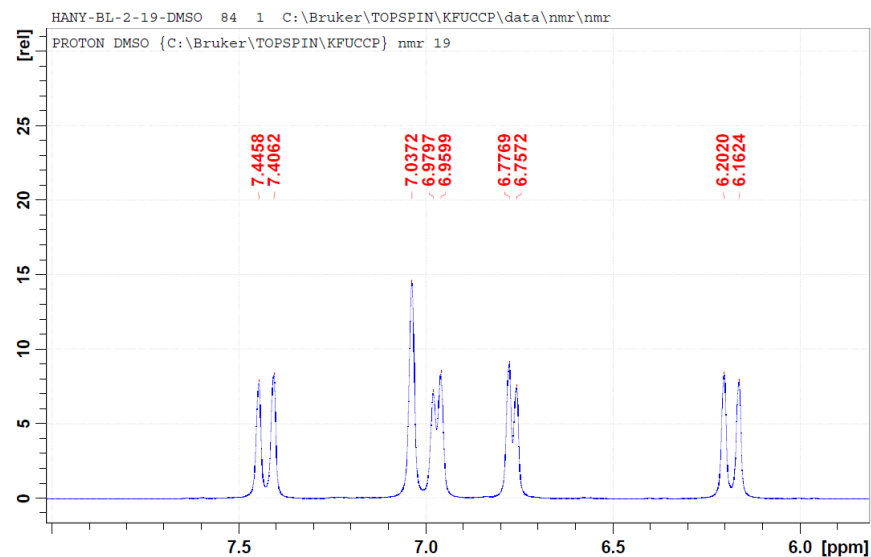

**$^1\text{H}$ -NMR expanded spectrum of Caffeic Acid (400 MHz, DMSO- $d_6$ )**

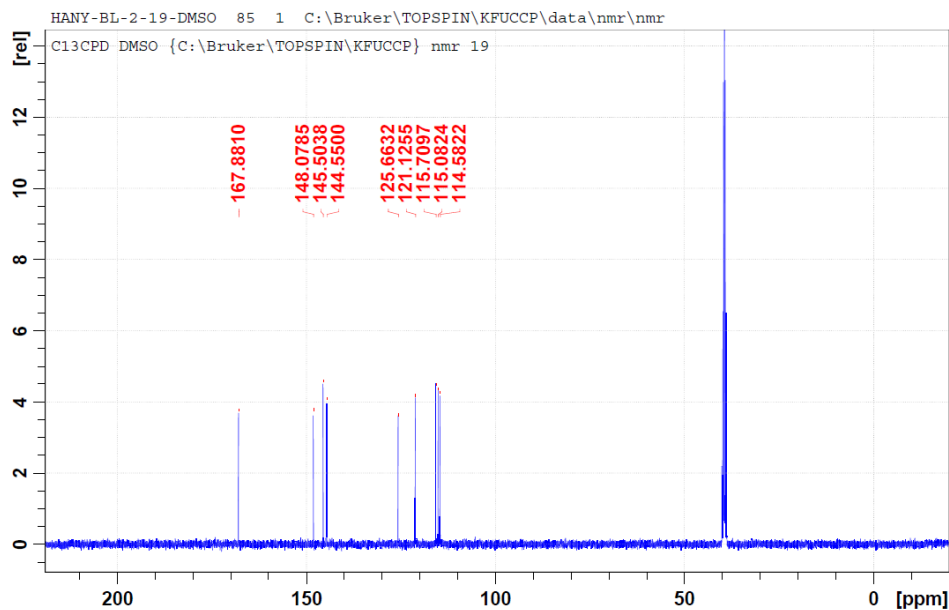

**$^{13}\text{C}$ -NMR spectrum of Caffeic Acid (100 MHz, DMSO- $d_6$ )**

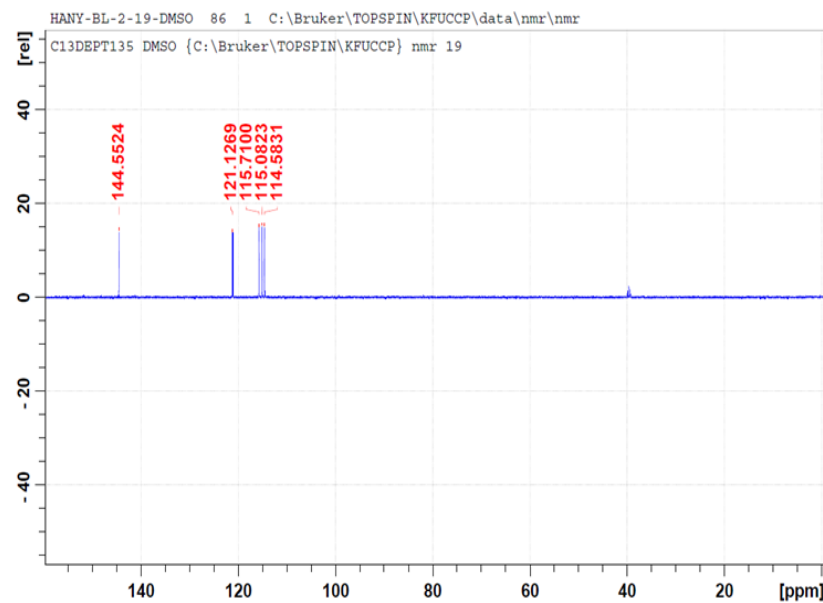

**DEPT spectrum of Caffeic Acid (100 MHz, DMSO- $d_6$ )**

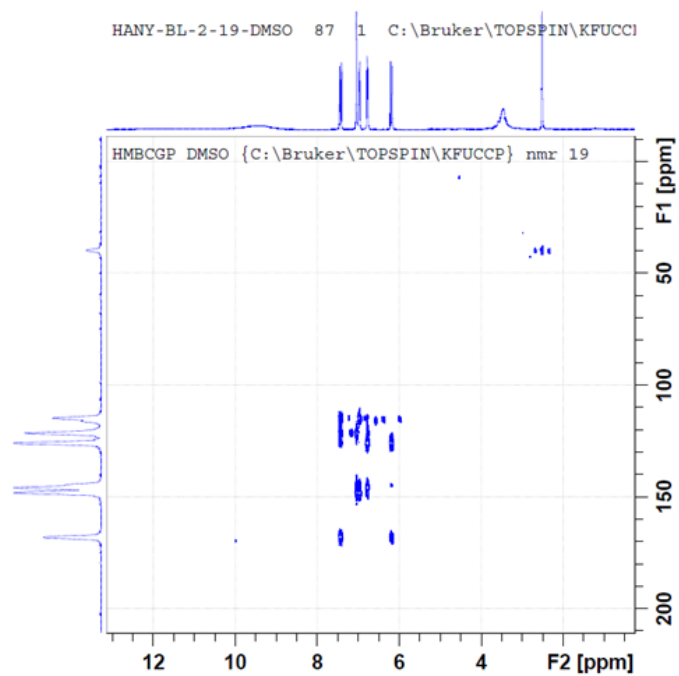

HMBC spectrum of Caffeic Acid

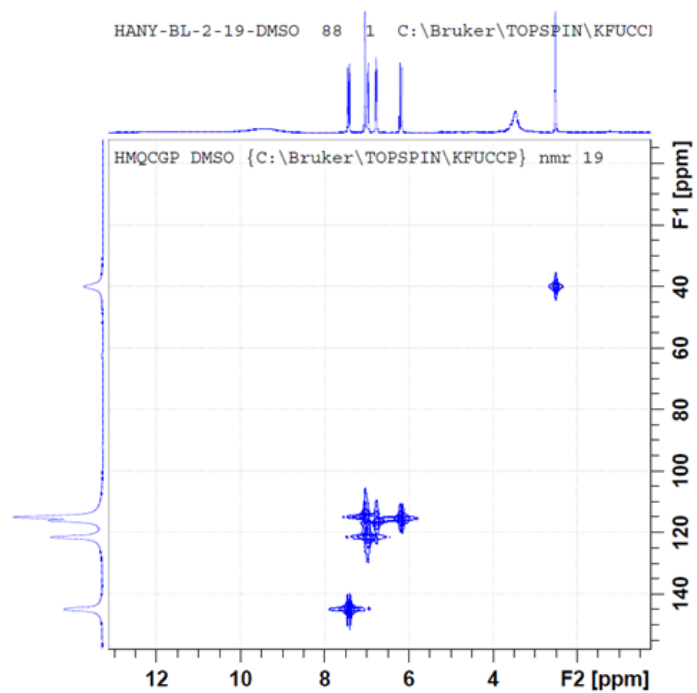

HMQC spectrum of Caffeic Acid

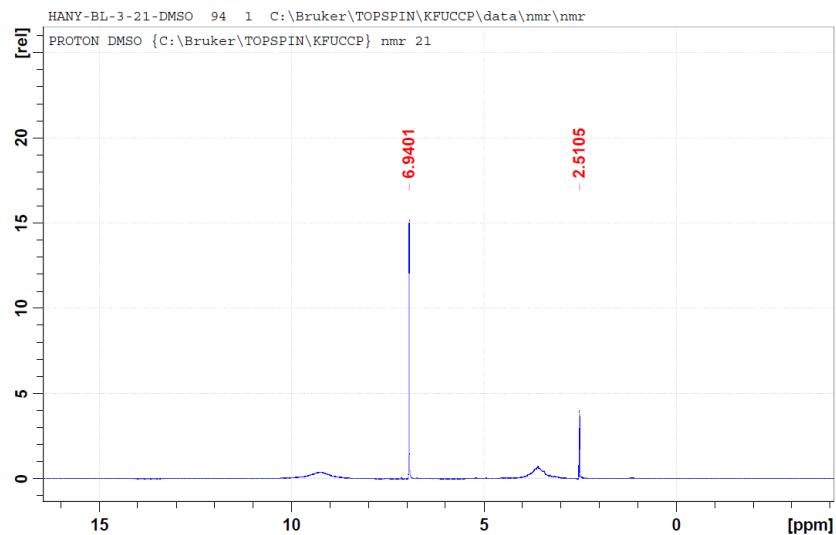

**$^1\text{H}$ -NMR full spectrum of Gallic Acid (400 MHz, DMSO- $d_6$ )**

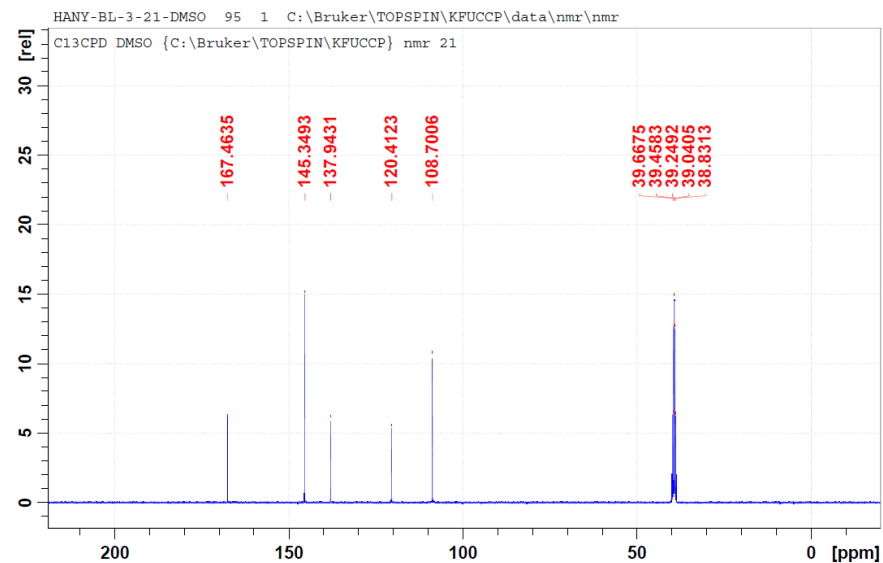

**$^{13}\text{C}$ -NMR spectrum of Gallic Acid (100 MHz, DMSO- $d_6$ )**

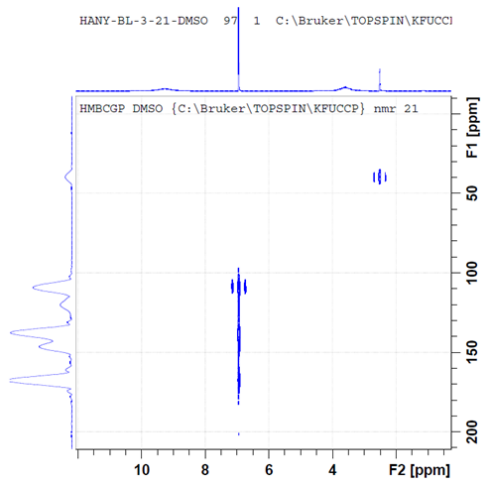

**HMBC spectrum of Gallic Acid**

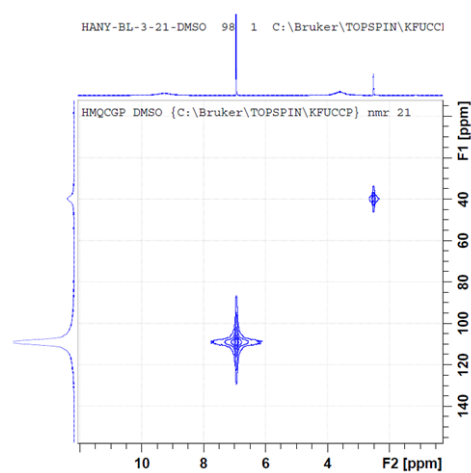

**HMQC spectrum of Gallic Acid**

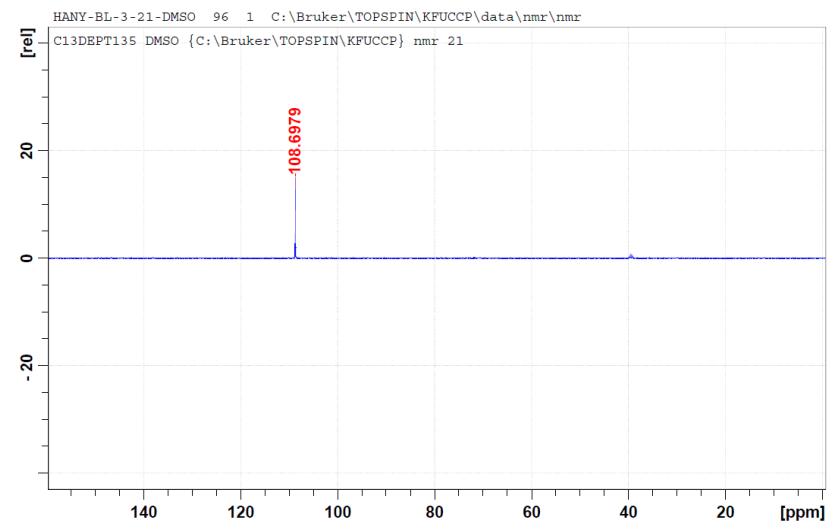

**DEPT spectrum of Gallic Acid (100 MHz, DMSO- $d_6$ )**

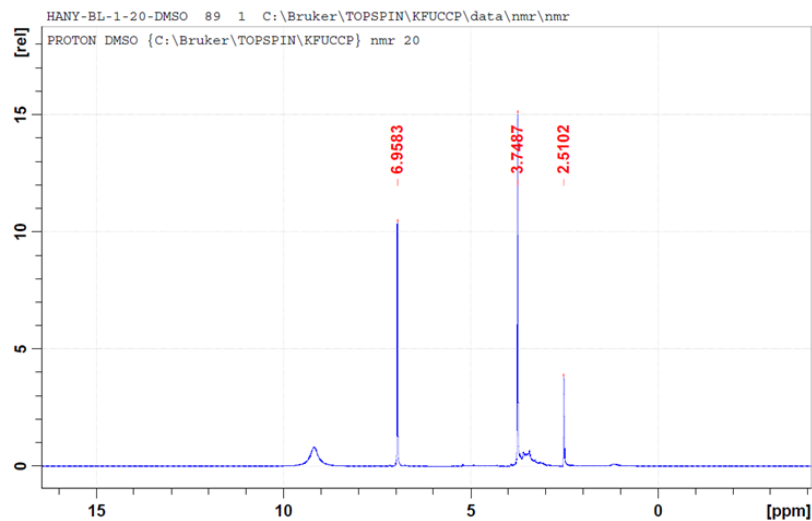

**$^1\text{H}$ -NMR full spectrum of Methyl gallate (400 MHz, DMSO- $d_6$ )**

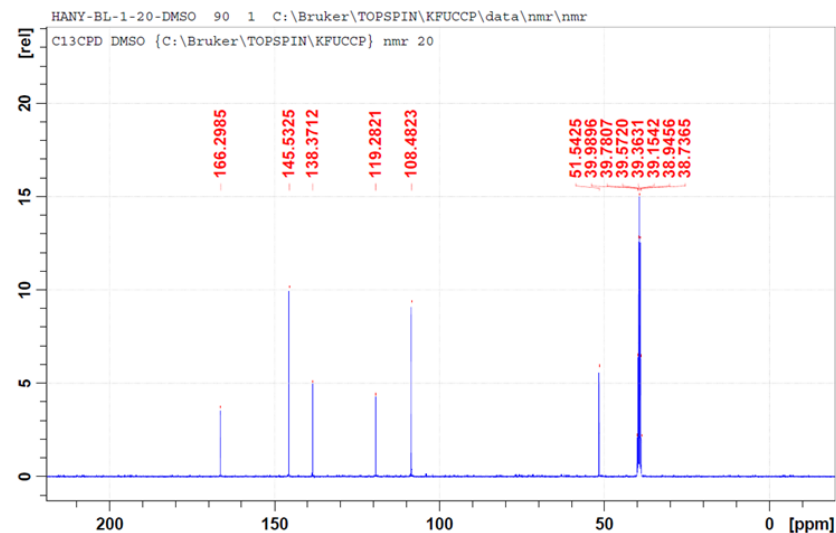

**$^{13}\text{C}$ -NMR spectrum of Methyl gallate (100 MHz, DMSO- $d_6$ )**

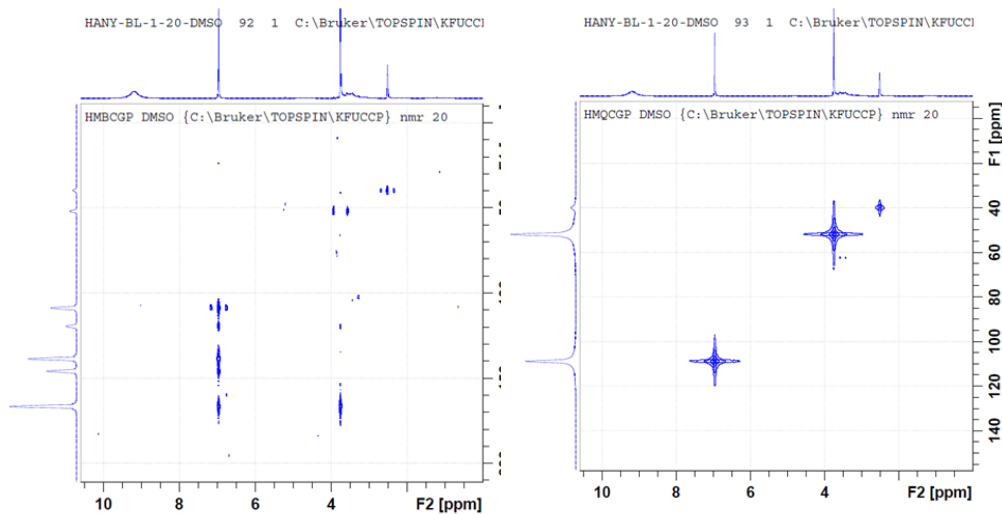

**HMBC spectrum of Methyl gallate**

**HMQC spectrum of Methyl gallate**

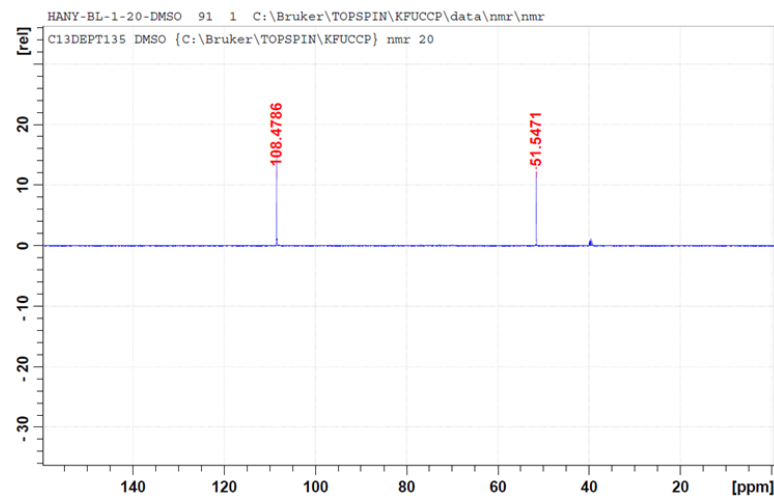

**DEPT spectrum of Methyl gallate (100 MHz, DMSO- $d_6$ )**
